# Supplementary material for: Catalyst-free synthesis of poly(furfuryl alcohol) using deep eutectic solvents
Source: Royal Society of Chemistry journal article supplement (doi:10.1039/d1nj05723e), 2022-01-01
Supplement: d1nj05723e1.pdf [file d1nj05723e1.pdf]

## Supplementary Information

### Catalyst free synthesis of poly(furfuryl alcohol) using deep eutectic solvent

Thanh Phuong Cao,<sup>a</sup> Chuc Nguyen Hang,<sup>a</sup> Hieu Vu-Quang,<sup>b</sup> Daniel Manaye Kabtamu,<sup>c</sup> Subodh Kumar,<sup>\*d</sup> Van Cuong Nguyen,<sup>a</sup> Xuan Thang Cao<sup>\*a</sup>

<sup>a</sup> Faculty of Chemical Engineering, Industrial University of Ho Chi Minh City, Vietnam

<sup>b</sup> NTT Institute of Hi-Technology, Nguyen Tat Thanh University, Ho Chi Minh City, Vietnam

<sup>c</sup> Department of Materials Science and Engineering, National Taiwan University of Science and Technology, Taipei 10607, Taiwan

<sup>d</sup> Department of Inorganic Chemistry, Faculty of Science, Palacký University, Olomouc 779 00, Czech Republic

\*Correspondence: caoxuanthang@iuh.edu.vn; subodh.kumar@upol.cz

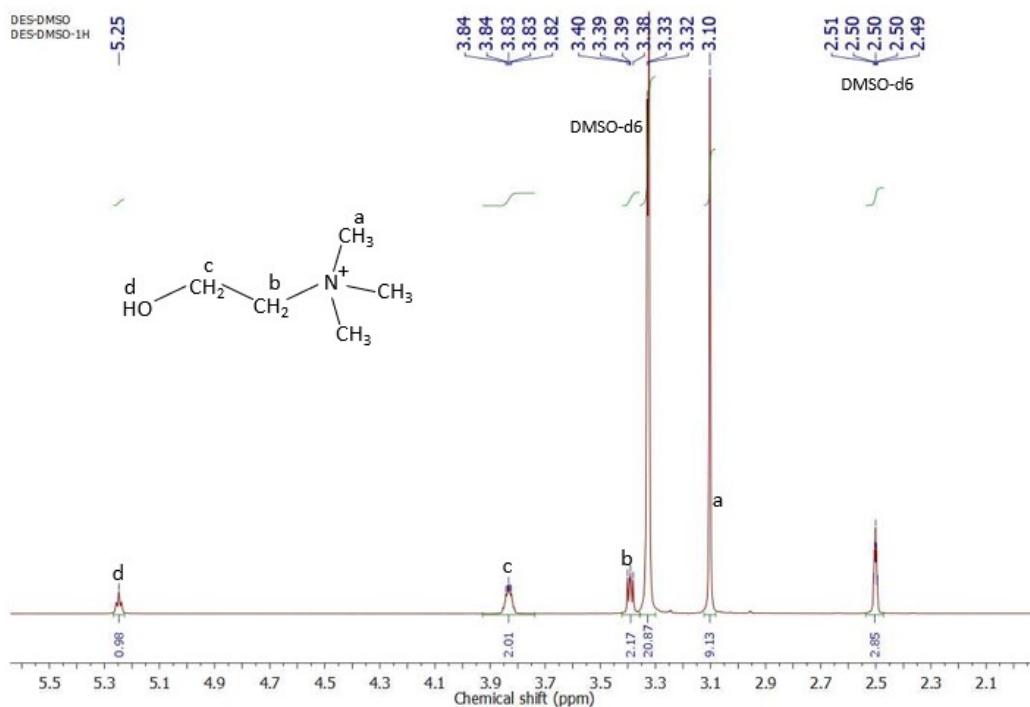

Figure S1. <sup>1</sup>H-NMR spectrum of DES1 [ChCl: ZnCl<sub>2</sub> (1: 2)]

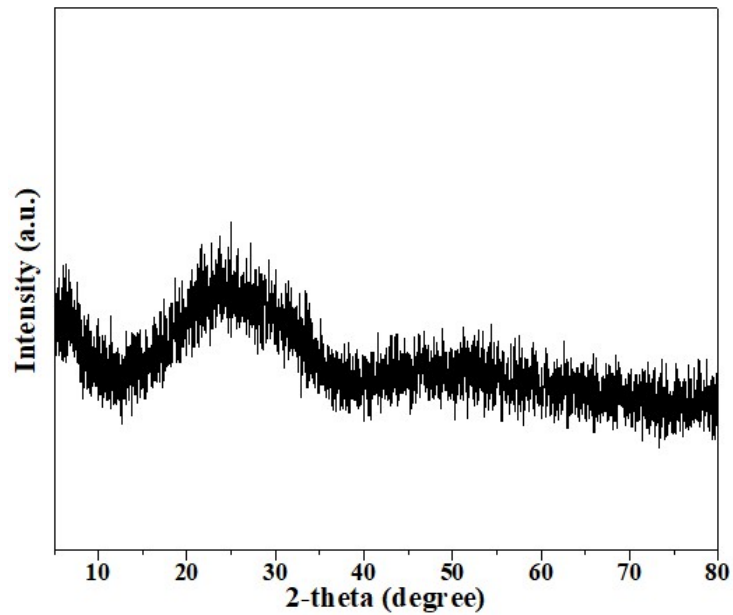

**Figure S2.** XRD pattern of DES1 [ChCl: ZnCl<sub>2</sub> (1: 2)]

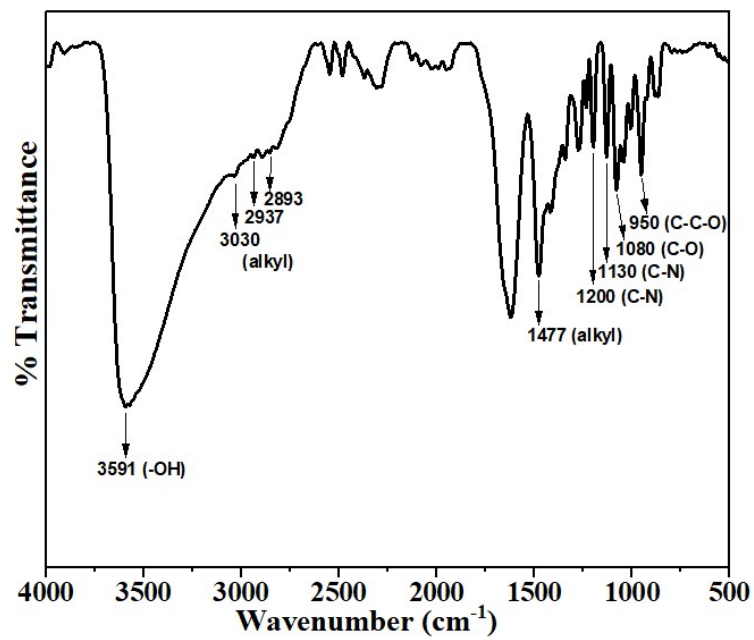

**Figure S3.** FTIR spectrum of DES1 [ChCl: ZnCl<sub>2</sub> (1: 2)]

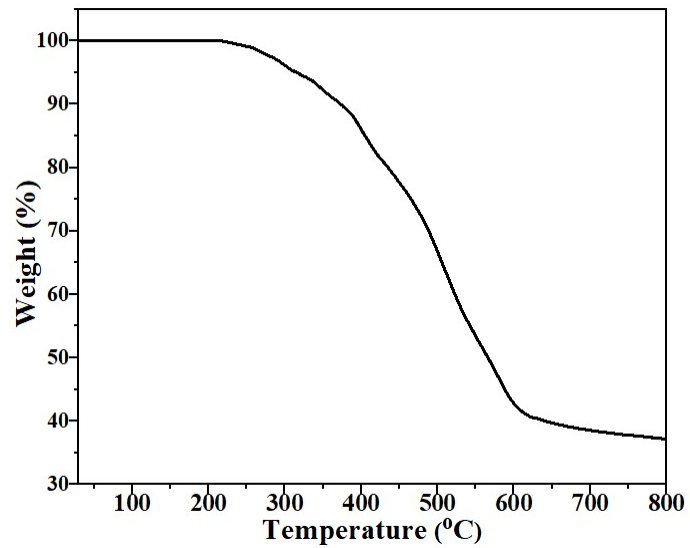

**Figure S4.** TGA curve of DES1 [ChCl: ZnCl<sub>2</sub> (1: 2)]

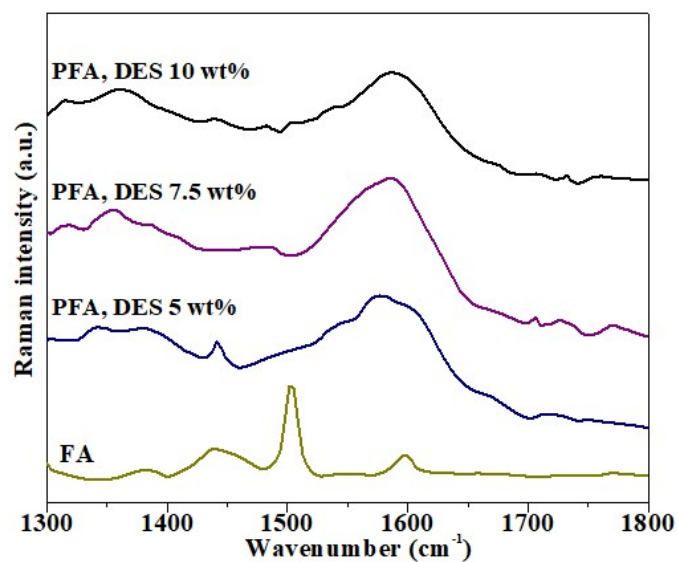

**Figure S5.** Raman spectra (UV laser excitation at 535 nm) of FA and PFA polymerized by different weight ratios of DES1/FA at 60 °C for 4 h.

**Table S1.** Literature FA polymerization using different catalysts

| Entry | Catalyst                                            | Weight ratio % | Solvent                         | Ref.      |
|-------|-----------------------------------------------------|----------------|---------------------------------|-----------|
| 1.    | maleic anhydride                                    | 10             | Ethanol                         | [1]       |
| 2.    | oxalic acid                                         | ~0.5           | -                               | [2]       |
| 3.    | iodine                                              | ~0.5           | -                               | [2]       |
| 4.    | <i>p</i> -toluenesulfonic acid                      | -              | -                               | [3]       |
| 5.    | <i>p</i> -toluenesulfonic acid                      | ~3.0           | CH <sub>2</sub> Cl <sub>2</sub> | [4]       |
| 6.    | magnite-H <sup>+</sup>                              | 15             | CH <sub>2</sub> Cl <sub>2</sub> | [5]       |
| 7.    | sulfuric acid                                       | -              | -                               | [6],[7]   |
| 8.    | HCl                                                 | -              | -                               | [8],[9]   |
| 9.    | Lewis-acid (SnCl <sub>4</sub> , TiCl <sub>4</sub> ) | -              | CH <sub>2</sub> Cl <sub>2</sub> | [10]      |
| 10.   | titanium(IV) butoxide                               | 6-80           | -                               | [11]      |
| 11.   | ChCl:ZnCl <sub>2</sub> deep eutectic solvent        | 10             | -                               | This work |

## References

- [1] N. Herold, T. Dietrich, W. J. Grigsby, R. A. Franich, A. Winkler, B. Buchelt, and A. Pfriem, *BioResources*, 2013, 8, 1064-1075.
- [2] C. Song, T. Wang, H. Jiang, X. Wang, Y. Cao, and J. Qiu, *J. Membrane Sci.*, 2010, 361, 22–27.
- [3] O. Lépine, M. Birot, H. Deleuze, *Macromol. Mater. Eng.*, 2009, 294, 599–604.
- [4] M. Principe, P. Ortiz, and R. Martínez, *Polym. Int.*, 1999, 48, 637–641.
- [5] D.E. Kherroub, M. Belbachir, and S. Lamouri, *Arab. J. Sci. Eng.*, 2014, 40, 143–150.
- [6] S. S. Oishi, M. C. Rezende, F. D. Origo, A. J. Damião, and E. C. Botelho, *J. Appl. Polym. Sci.*, 2012, 128, 1680-1686.
- [7] T. Kim, R.S. Assary, C.L. Marshall, D.J. Gosztola, L.A. Curtiss and P.C. Stair, *ChemCatChem*, 2011, 3, 1451-1458.
- [8] Y. Feng, Y. Wang, Y. Wang, and J. Yao, *J. Mater. Chem. A*, 2017, 5, 21893–21897.
- [9] S. Bertarione, F. Bonino, F. Cesano, S. Jain, M. Zanetti, D. Scarano, and A. Zecchina, *J. Phys. Chem. B* 2009, 113, 31, 10571–10574.
- [10] M. Choura, N. M. Belgacem, and A. Gandini, *Macromolecules*, 1996, 29, 3839–3850.
- [11] J. Yao and H. Wang, *Ind. Eng. Chem. Res.* 2007, 46, 19, 6264–6268.
